# Supplementary material for: AA9int: SNP interaction pattern search using non-hierarchical additive model set
Source: Oxford University Press journal article supplement (doi:10.1093/bioinformatics/bty461), 2018-06-05
Supplement: bioinformatics_34_24_4141_s1.docx [file bioinformatics_34_24_4141_s1.docx]

**The PRACTICAL CONSORTIUM (in addition to those named in the author list)**

Information of the consortium can be found at: **http://practical.icr.ac.uk/**

Additional members from the consortium are: Margaret Cook1, Angela Morgan2, Artitaya Lophatananon3, Cyril Fisher2, Daniel Leongamornlert4, Edward J. Saunders2, Emma J. Sawyer2, Koveela Govindasami2, Malgorzata Tymrakiewicz2, Michelle Guy2, Naomi Livni2, Rosemary Wilkinson2, Sara Jugurnauth-Little2, Steve Hazel2, Tokhir Dadaev2, Melissa C. Southey5, Liesel M. Fitzgerald6, John Pedersen7, John Hopper8, Robert MacInnis6,8, Robert Szulkin9, Ami Karlsson10, Carin Cavalli-Bjoerkman10, Jan-Erik Johansson11, Jan Adolfsson12, Markus Aly10, Michael Broms10, Par Stattin13, Brian E. Henderson 14(†), Anssi Auvinen15, Kimmo Taari16, Kirsi Talala17, Paula Kujala18, Teemu Murtola19,20, Teuvo LJ Tammela21, Csilla Sipeky22, Martin Andreas Røder23, Peter Iversen23, Peter Klarskov24, Sune F. Nielsen25,26, Tim J. Key27, Hans Wallinder28, Sven Gustafsson28, Jenny L. Donovan29, Freddie Hamdy30, Angela Cox31, Anne George32, Athene Lane29, Gemma Marsden30, Michael Davis30, Paul Brown33, Paul Pharoah34, Lisa B. Signorello35, Wei Zheng36, Shannon K. McDonnell37, Daniel J. Schaid37, Liang Wang37, Lori Tillmans37, Shaun Riska37, Antje Rinckleb38, Kathleen Herkommer39, Manuel Luedeke40, Walther Vogel40, Dominika Wokolorczyk41, Jan Lubiski41, Wojciech Kluzniak41, Kai-Uwe Saum42, Christa Stegmaier43, Babu Zachariah44, Hui-Yi Lin45, Hyun Park44, James Haley44, Julio Pow-Sang46, Maria Rincon44, Selina Radlein44, Thomas A. Sellers44, Chavdar Slavov47, Aleksandrina Vlahova48, Atanaska Mitkova49, Darina Kachakova49, Elenko Popov47, Svetlana Christova48, Tihomir Dikov48, Vanio Mitev49, Allison Eckert50, APCB BioResource50,51, Amanda Spurdle52, Angus Collins50, Glenn Wood50, Greg Malone50, Judith A. Clements50, Kimberly Alexander50, Kris Kerr50, Mary-Anne Kedda50, Megan Turner50, Pamela Saunders50, Peter Heathcote50, Srilakshmi Srinivasan50, Tracy Omara50, Trina Yeadon50, Joana Santos53, Carmen Jerónimo53, Paula Paulo53, Pedro Pinto53, Rui Henrique53, Sofia Maia53, Agnieszka Michael54, Huihai Wu55, Suzanne Kolb55, Fredrick Schumacher56, Hong-Wei Zhang57, Mohamed El Tibi58.

1Centre for Cancer Genetic Epidemiology, Department of Public Health and Primary Care, University of Cambridge, Strangeways Research Laboratory, Worts Causeway, Cambridge CB1 8RN, UK, 2The Institute of Cancer Research, Sutton, UK, 3Institute of Population Health, University of Manchester, Manchester, UK, 4Cancer Genome Project, Wellcome Trust Sanger Institute, Hinxton, CB10 1SA, UK, 5Genetic Epidemiology Laboratory, Department of Pathology, The University of Melbourne, Grattan Street, Parkville, Victoria 3010, Australia, 6Cancer Epidemiology Intelligence Division, Cancer Council Victoria, 615 St Kilda Road, Melbourne, Victoria, Australia, 7Tissupath Pty Ltd., Melbourne,Victoria 3122, Australia, 8Centre for Epidemiology and Biostatistics, Melbourne School of Population and Global Health, The University of Melbourne, Melbourne, Victoria, Australia, 9Division of Family Medicine, Department of Neurobiology, Care Science and Society, Karolinska Institutet, Huddinge, Sweden, 10Department of Medical Epidemiology and Biostatistics, Karolinska Institute, Stockholm, Sweden, 11Department of Urology, Faculty of Medicine and Health, Örebro University, Örebro, Sweden, 12Department of Clinical Science, Intervention and Technology, Karolinska Institutet, Stockholm, Sweden, 13Department of Surgical and Perioperative Sciences, Urology and Andrology, Umea University, Umeå, Sweden , 14Department of Preventive Medicine, Keck School of Medicine, University of Southern California/Norris Comprehensive Cancer Center, Los Angeles, California, USA, 15Department of Epidemiology, School of Health Sciences, University of Tampere, Tampere, Finland, 16Department of Urology, Helsinki University Central Hospital and University of Helsinki, Helsinki, Finland, 17Finnish Cancer Registry, Helsinki, Finland, 18Fimlab Laboratories, Tampere University Hospital, Tampere, Finland, 19Faculty of Medicine and Life Sciences, University of Tampere, Tampere, Finland, 20Department of Urology, Karolinska University Hospital, Stockholm, Sweden, 21Department of Urology, Tampere University Hospital and Medical School, University of Tampere, Finland, 22Department of Medical Biochemistry and Genetics, Institute of Biomedicine, Kiinamyllynkatu 10, FI-20014 University of Turku, Finland, 23Copenhagen Prostate Cancer Center, Department of Urology, Rigshospitalet, Copenhagen University Hospital, Tagensvej 20, 7521, DK-2200 Copenhagen, Denmark, 24Department of Urology, Herlev Hospital, Copenhagen University Hospital, Herlev Ringvej 75, DK-230 Herlev, Denmark, 25Faculty of Health and Medical Sciences, University of Copenhagen, 26Department of Clinical Biochemistry, Herlev Hospital, Copenhagen University Hospital, Herlev Ringvej 75, DK-230 Herlev, Denmark, 27Cancer Epidemiology Unit, Nuffield Department of Clinical Medicine, University of Oxford, Oxford, UK, 28Department of Epidemiology and Biostatistics, School of Public Health, Imperial College, London, UK, 29School of Social and Community Medicine, University of Bristol, Canynge Hall, 39 Whatley Road, Bristol, BS8 2PS, UK, 30Nuffield Department of Surgical Sciences, University of Oxford, Oxford, UK, Faculty of Medical Science, University of Oxford, John Radcliffe Hospital, Oxford, UK, 31Sheffield Institute for Nucleic Acids, University of Sheffield, Sheffield, UK, 32Cambridge Cancer Trials Centre, Cambridge Clinical Trials Unit - Cancer Theme, Cambridge University Hospitals NHS Foundation Trust, Box 279 (S4), Addenbrookes Hospital, Cambridge Biomedical Campus, Hills Road, Cambridge, CB2 0QQ, UK, 33University of Cambridge, Department of Oncology, Box 279, Addenbrooke's Hospital, Hills Road Cambridge CB2 0QQ, UK, 34Centre for Cancer Genetic Epidemiology, Department of Oncology, University of Cambridge, Strangeways Research Laboratory, Worts Causeway, Cambridge, UK, 35National Cancer Institute, NIH, 9609 Medical Center Drive, Suite 2W-172, MSC 9712, Bethesda, MD, 20892-9712 (mail), Rockville, MD 20850 (FedEx/Courier), USA, 36Division of Epidemiology, Department of Medicine, Vanderbilt University Medical Center, 2525 West End Avenue, Suite 800, Nashville, TN 37232 USA, 37Mayo Clinic, Rochester, Minnesota, USA, 38Department of Urology, University Hospital Ulm, Germany, 39Department of Urology, Klinikum rechts der Isar der Technischen Universitaet Muenchen, Munich, Germany, 40Institute of Human Genetics, University Hospital of Ulm, Ulm, Germany, 41International Hereditary Cancer Center, Department of Genetics and Pathology, Pomeranian Medical University, Szczecin, Poland, 42Division of Clinical Epidemiology and Aging Research, German Cancer Research Center (DKFZ), 69120 Heidelberg, Germany, 43Saarland Cancer Registry, 66119 Saarbruecken, Germany, 44Department of Cancer Epidemiology, Moffitt Cancer Center, 12902 Magnolia Drive, Tampa, FL 33612, USA, 45Biostatistics Program, Moffitt Cancer Center, 12902 Magnolia Drive, Tampa, FL 33612, USA, 46Genitourinary Program, Moffitt Cancer Center, 12902 Magnolia Drive, Tampa, FL 33612, USA, 47Department of Urology and Alexandrovska University Hospital, Medical University, Sofia, Bulgaria, 48Department of General and Clinical Pathology, Medical University, Sofia, Bulgaria, 49Department of Medical Chemistry and Biochemistry, Molecular Medicine Center, Medical University, Sofia, 2 Zdrave Str., 1431 Sofia, Bulgaria, 50Australian Prostate Cancer Research Centre-Qld, Institute of Health and Biomedical Innovation and School of Biomedical Science, Queensland University of Technology, Brisbane, Australia, 51Australian Prostate Cancer BioResource, Brisbane, QLD, 52Molecular Cancer Epidemiology Laboratory, Queensland Institute of Medical Research, Brisbane, Australia, 53Department of Genetics, Portuguese Oncology Institute, Porto, Portugal, 54 The University of Surrey, Guildford, Surrey, GU2 7XH, UK, 55 Division of Public Health Sciences, Fred Hutchinson Cancer Research Center, Seattle, Washington, 98109-1024, USA, 56Case Western Reserve University, School of Medicine, 10900 Euclid Ave., Cleveland, OH, 44106-4945, USA, 57Second Military Medical University, 800 Xiangyin Rd., Shanghai 200433, P. R. China, 58University Hospital "Tsaritsa Yoanna", Medical University, Sofia, Bulgaria.

(†) In Memorium

**Funding for the CRUK study and PRACTICAL consortium:**

This work was supported by the Canadian Institutes of Health Research, European Commission's Seventh Framework Programme grant agreement n° 223175 (HEALTH-F2-2009-223175), Cancer Research UK Grants C5047/A7357, C1287/A10118, C5047/A3354, C5047/A10692, C16913/A6135, and The National Institute of Health (NIH) Cancer Post-Cancer GWAS initiative grant: No. 1 U19 CA 148537-01 (the GAME-ON initiative).

**COGS acknowledgement:**

This study would not have been possible without the contributions of the following: Per Hall (COGS); Douglas F. Easton, Paul Pharoah, Kyriaki Michailidou, Manjeet K. Bolla, Qin Wang (BCAC), Andrew Berchuck (OCAC), Rosalind A. Eeles, Douglas F. Easton, Ali Amin Al Olama, Zsofia Kote-Jarai, Sara Benlloch (PRACTICAL), Georgia Chenevix-Trench, Antonis Antoniou, Lesley McGuffog, Fergus Couch and Ken Offit (CIMBA), Joe Dennis, Alison M. Dunning, Andrew Lee, and Ed Dicks, Craig Luccarini and the staff of the Centre for Genetic Epidemiology Laboratory, Javier Benitez, Anna Gonzalez-Neira and the staff of the CNIO genotyping unit, Jacques Simard and Daniel C. Tessier, Francois Bacot, Daniel Vincent, Sylvie LaBoissière and Frederic Robidoux and the staff of the McGill University and Génome Québec Innovation Centre, Stig E. Bojesen, Sune F. Nielsen, Borge G. Nordestgaard, and the staff of the Copenhagen DNA laboratory, and Julie M. Cunningham, Sharon A. Windebank, Christopher A. Hilker, Jeffrey Meyer and the staff of Mayo Clinic Genotyping Core Facility

Funding for the iCOGS infrastructure came from: the European Community's Seventh Framework Programme under grant agreement n° 223175 (HEALTH-F2-2009-223175) (COGS), Cancer Research UK (C1287/A10118, C1287/A 10710, C12292/A11174, C1281/A12014, C5047/A8384, C5047/A15007, C5047/A10692, C8197/A16565), the National Institutes of Health (CA128978) and Post-Cancer GWAS initiative (1U19 CA148537, 1U19 CA148065 and 1U19 CA148112 - the GAME-ON initiative), the Department of Defence (W81XWH-10-1-0341), the Canadian Institutes of Health Research (CIHR) for the CIHR Team in Familial Risks of Breast Cancer, Komen Foundation for the Cure, the Breast Cancer Research Foundation, and the Ovarian Cancer Research Fund.
