# Supplementary material for: AA9int: SNP interaction pattern search using non-hierarchical additive model set
Source: Oxford University Press journal article supplement (doi:10.1093/bioinformatics/bty461), 2018-06-05
Supplement: bioinformatics_34_24_4141_s2.pdf [file bioinformatics_34_24_4141_s2.pdf]

Suppl. Table 1. SNP coding scheme of the inheritance modes

| SNP1<br>Maj/Min <sup>1</sup> =A/a | <b>Additive<sup>2</sup></b> |            | <b>Dominant<sup>2</sup></b> |         | <b>Recessive<sup>2</sup></b> |         |
|-----------------------------------|-----------------------------|------------|-----------------------------|---------|------------------------------|---------|
|                                   | Original                    | Reverse    | Original                    | Reverse | Original                     | Reverse |
| AA                                | 0                           | 2          | 0                           | 1       | 0                            | 1       |
| Aa                                | 1                           | 1          | 1                           | 0       | 0                            | 1       |
| aa                                | 2                           | 0          | 1                           | 0       | 1                            | 0       |
| Data type                         | Continuous                  | Continuous | Binary                      | Binary  | Binary                       | Binary  |

<sup>1</sup>Maj/Min= major/minor allele

<sup>2</sup>Original modes are based on a minor allele 'a'; Reverse coding is (1 - original coding) for the dominant and recessive mode, and (2 - original coding) for the additive mode

Suppl. Table 2. Descriptions of the 45 models of the SNP Interaction Pattern Identifier (SIPI)

| Model number & label | Model description <sup>1</sup> |                                                                                                            |
|----------------------|--------------------------------|------------------------------------------------------------------------------------------------------------|
| 1                    | DD_Full                        | Full interaction model, SNP1 with Dom coding and SNP2 with Dom coding                                      |
| 2                    | DD_M1_int_o1                   | Model with main effect of SNP1 plus an interaction, SNP1 with original Dom coding and SNP2 with Dom coding |
| 3                    | DD_M1_int_r1                   | Model with main effect of SNP1 plus an interaction, SNP1 with reverse Dom coding and SNP2 with Dom coding  |
| 4                    | DD_M2_int_o2                   | Model with main effect of SNP2 plus an interaction, SNP1 with Dom coding and SNP2 with original Dom coding |
| 5                    | DD_M2_int_r2                   | Model with main effect of SNP2 plus an interaction, SNP1 with Dom coding and SNP2 with reverse Dom coding  |
| 6                    | DD_int_oo                      | Interaction-only model, SNP1 with original Dom coding and SNP2 with original Dom coding                    |
| 7                    | DD_int_or                      | Interaction-only model, SNP1 with original Dom coding and SNP2 with reverse Dom coding                     |
| 8                    | DD_int_ro                      | Interaction-only model, SNP1 with reverse Dom coding and SNP2 with original Dom coding                     |
| 9                    | DD_int_rr                      | Interaction-only model, SNP1 with reverse Dom coding and SNP2 with reverse Dom coding                      |
| 10                   | DR_Full                        | Full interaction model, SNP1 with Dom coding and SNP2 with Rec coding                                      |
| 11                   | DR_M1_int_o1                   | Model with main effect of SNP1 plus an interaction, SNP1 with original Dom coding and SNP2 with Rec coding |
| 12                   | DR_M1_int_r1                   | Model with main effect of SNP1 plus an interaction, SNP1 with reverse Dom coding and SNP2 with Rec coding  |
| 13                   | DR_M2_int_o2                   | Model with main effect of SNP2 plus an interaction, SNP1 with Dom coding and SNP2 with original Rec coding |
| 14                   | DR_M2_int_r2                   | Model with main effect of SNP2 plus an interaction, SNP1 with Dom coding and SNP2 with reverse Rec coding  |
| 15                   | DR_int_oo                      | Interaction-only model, SNP1 with original Dom coding and SNP2 with original Rec coding                    |
| 16                   | DR_int_or                      | Interaction-only model, SNP1 with original Dom coding and SNP2 with reverse Rec coding                     |
| 17                   | DR_int_ro                      | Interaction-only model, SNP1 with reverse Dom coding and SNP2 with original Rec coding                     |
| 18                   | DR_int_rr                      | Interaction-only model, SNP1 with reverse Dom coding and SNP2 with reverse Rec coding                      |
| 19                   | RD_Full                        | Full interaction model, SNP1 with Rec coding and SNP2 with Dom coding                                      |
| 20                   | RD_M1_int_o1                   | Model with main effect of SNP1 plus an interaction, SNP1 with original Rec coding and SNP2 with Dom coding |
| 21                   | RD_M1_int_r1                   | Model with main effect of SNP1 plus an interaction, SNP1 with reverse Rec coding and SNP2 with Dom coding  |
| 22                   | RD_M2_int_o2                   | Model with main effect of SNP2 plus an interaction, SNP1 with Rec coding and SNP2 with original Dom coding |
| 23                   | RD_M2_int_r2                   | Model with main effect of SNP2 plus an interaction, SNP1 with Rec coding and SNP2 with reverse Dom coding  |
| 24                   | RD_int_oo                      | Interaction-only model, SNP1 with original Rec coding and SNP2 with original Dom coding                    |
| 25                   | RD_int_or                      | Interaction-only model, SNP1 with original Rec coding and SNP2 with reverse Dom coding                     |
| 26                   | RD_int_ro                      | Interaction-only model, SNP1 with reverse Rec coding and SNP2 with original Dom coding                     |
| 27                   | RD_int_rr                      | Interaction-only model, SNP1 with reverse Rec coding and SNP2 with reverse Dom coding                      |
| 28                   | RR_Full                        | Full interaction model, SNP1 with Rec coding and SNP2 with Rec coding                                      |
| 29                   | RR_M1_int_o1                   | Model with main effect of SNP1 plus an interaction, SNP1 with original Rec coding and SNP2 with Rec coding |
| 30                   | RR_M1_int_r1                   | Model with main effect of SNP1 plus an interaction, SNP1 with reverse Rec coding and SNP2 with Rec coding  |
| 31                   | RR_M2_int_o2                   | Model with main effect of SNP2 plus an interaction, SNP1 with Rec coding and SNP2 with original Rec coding |
| 32                   | RR_M2_int_r2                   | Model with main effect of SNP2 plus an interaction, SNP1 with Rec coding and SNP2 with reverse Rec coding  |
| 33                   | RR_int_oo                      | Interaction-only model, SNP1 with original Rec coding and SNP2 with original Rec coding                    |
| 34                   | RR_int_or                      | Interaction-only model, SNP1 with original Rec coding and SNP2 with reverse Rec coding                     |
| 35                   | RR_int_ro                      | Interaction-only model, SNP1 with reverse Rec coding and SNP2 with original Rec coding                     |
| 36                   | RR_int_rr                      | Interaction-only model, SNP1 with reverse Rec coding and SNP2 with reverse Rec coding                      |
| 37                   | AA_Full                        | Full interaction model, SNP1 with Add coding and SNP2 with Add coding                                      |
| 38                   | AA_M1_int_o1                   | Model with main effect of SNP1 plus an interaction, SNP1 with original Add coding and SNP2 with Add coding |
| 39                   | AA_M1_int_r1                   | Model with main effect of SNP1 plus an interaction, SNP1 with reverse Add coding and SNP2 with Add coding  |
| 40                   | AA_M2_int_o2                   | Model with main effect of SNP2 plus an interaction, SNP1 with Add coding and SNP2 with original Add coding |
| 41                   | AA_M2_int_r2                   | Model with main effect of SNP2 plus an interaction, SNP1 with Add coding and SNP2 with reverse Add coding  |
| 42                   | AA_int_oo                      | Interaction-only model, SNP1 with original Add coding and SNP2 with original Add coding                    |
| 43                   | AA_int_or                      | Interaction-only model, SNP1 with original Add coding and SNP2 with reverse Add coding                     |
| 44                   | AA_int_ro                      | Interaction-only model, SNP1 with reverse Add coding and SNP2 with original Add coding                     |
| 45                   | AA_int_rr                      | Interaction-only model, SNP1 with reverse Add coding and SNP2 with reverse Add coding                      |

<sup>1</sup> Model label: 'D' (dominant), 'R' (recessive), 'A' (additive); 'Full' (full interaction), 'M1\_int' (SNP1 main effect plus interaction); coding direction: 'o1' (original for SNP1), 'o2' (original for SNP2), 'r1' (reverse for SNP1), 'r2' (reverse for SNP2), 'oo' (original-original for SNP1-SNP2), 'or' (reverse-original), 'ro' (reverse-original), and 'rr' (reverse-reverse). If coding direction ('o'/r') is not specified, the original coding is applied.

Suppl. Figure 1a. SIPI interaction models: dominant-dominant (DD) and dominant-recessive (DR) modes<sup>1</sup>

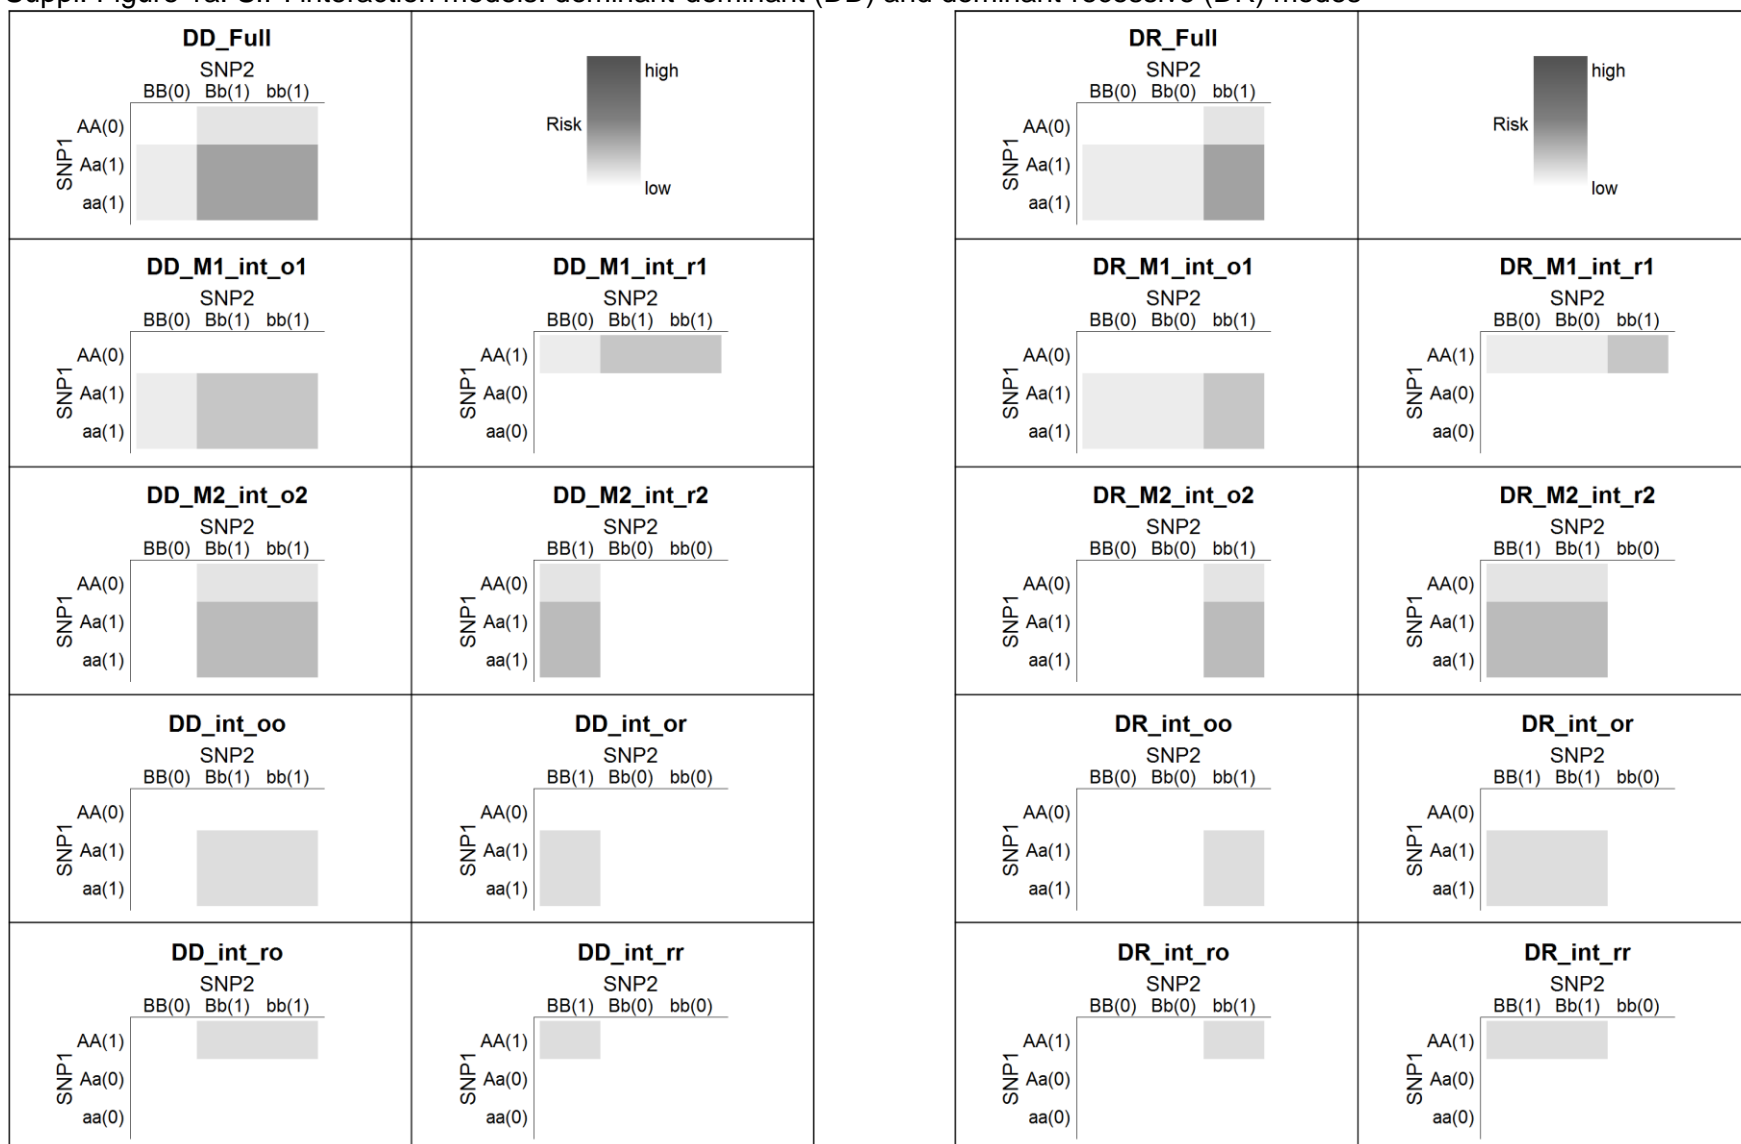

<sup>1</sup> **Model label:** 'D' (dominant), 'R' (recessive); 'Full' (full interaction), 'M1\_int' (SNP1 main effect plus interaction); coding direction: 'o1' (original for SNP1), 'o2' (original for SNP2), r1' (reverse for SNP1), 'r2' (reverse for SNP2), 'oo' (original-original for SNP1-SNP2), 'or' (reverse-original), 'ro' (reverse-original), and 'rr' (reverse-reverse). The labels of two axes are '**genotype (coding)**'. A lowercase and capital letter denotes the minor and major allele, respectively. Color levels represent present outcome proportions. The darker the color, the higher the outcome proportion. These plots are the SIPI pattern examples based on positive model coefficients in SIPI models. If coding direction ('o'/'r') is not specified, the original coding is applied.

Suppl. Figure 1b. SIPI interaction models: recessive-dominant (RD) and recessive-recessive (RR) modes<sup>1</sup>

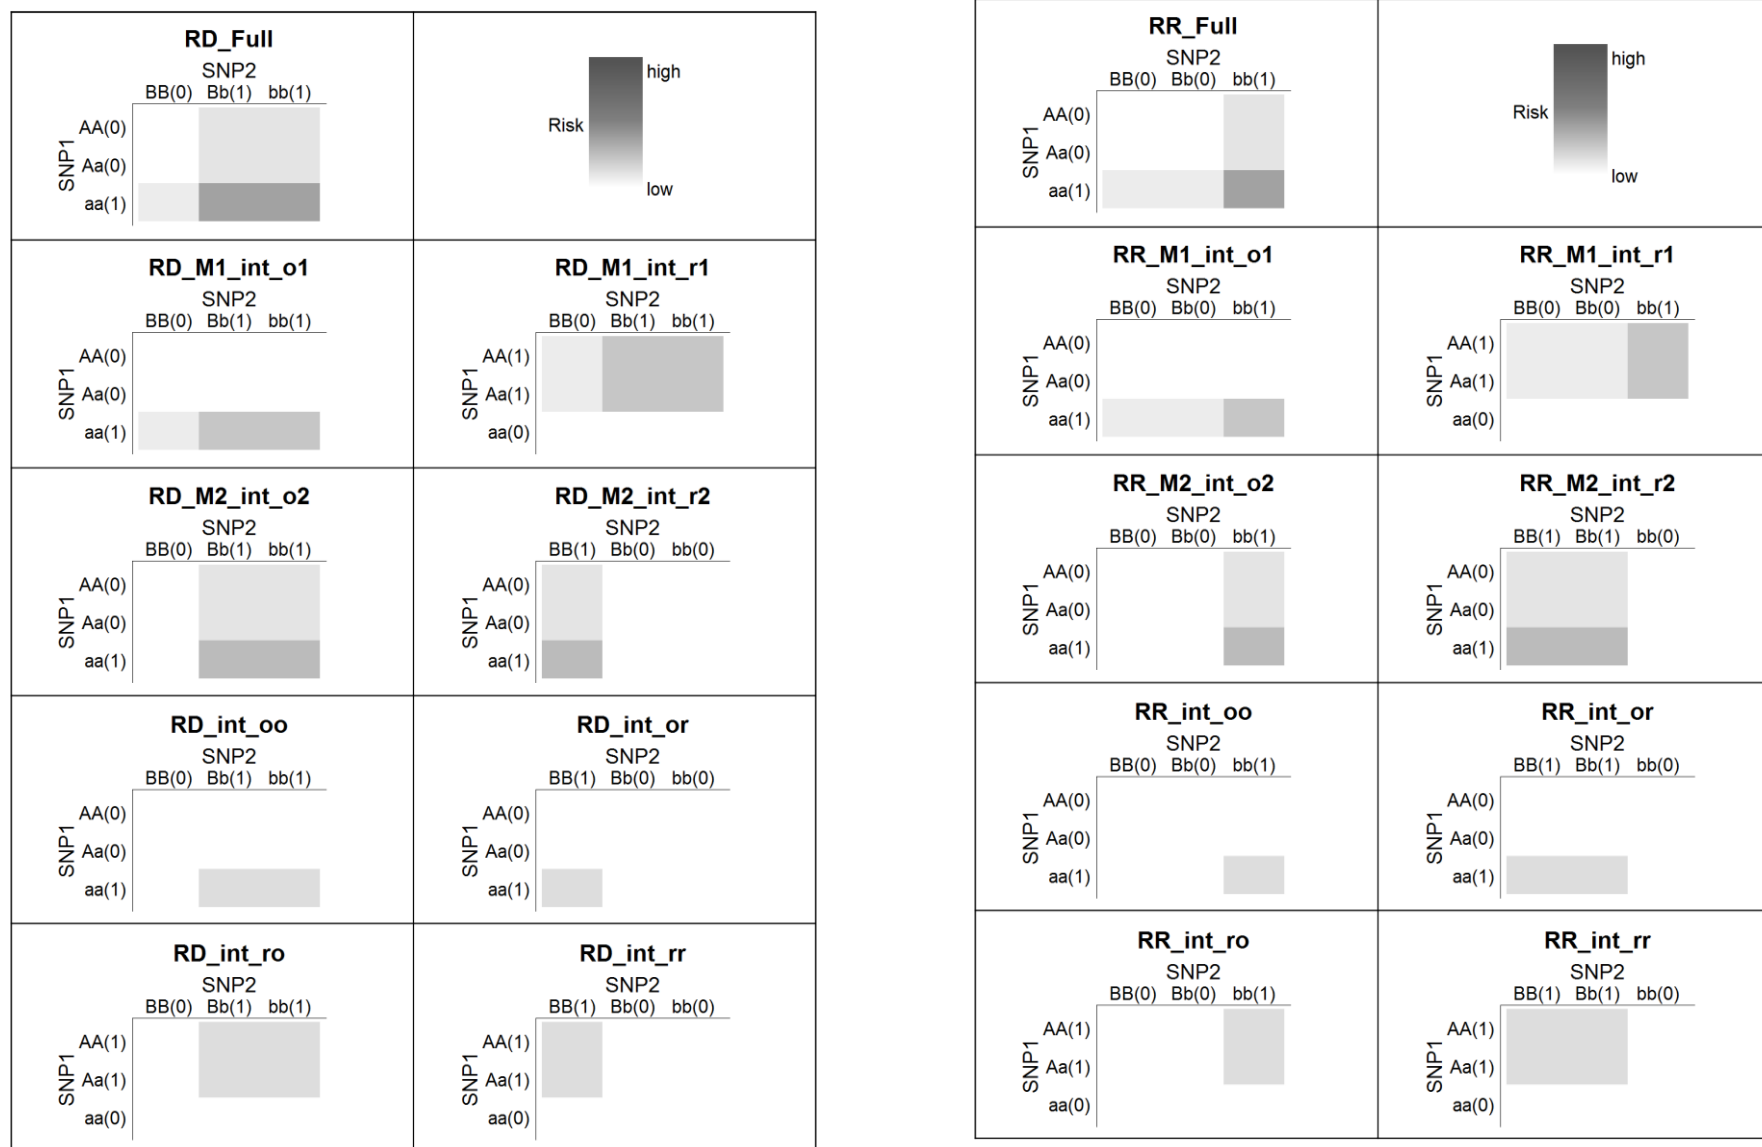

<sup>1</sup> **Model label:** 'D' (dominant), 'R' (recessive); 'Full' (full interaction), 'M1\_int' (SNP1 main effect plus interaction); coding direction: 'o1' (original for SNP1), 'o2' (original for SNP2), 'r1' (reverse for SNP1), 'r2' (reverse for SNP2), 'oo' (original-original for SNP1-SNP2), 'or' (reverse-original), 'ro' (reverse-original), and 'rr' (reverse-reverse). The labels of two axes are **genotype (coding)**. A lowercase and capital letter denotes the minor and major allele, respectively. Color levels represent present outcome proportions. The darker the color, the higher the outcome proportion. For the 'Full' model, the figure is an example pattern based on both minor alleles as risk alleles. These plots are the SIPI pattern examples based on positive model coefficients in SIPI models. If coding direction ('o'/'r') is not specified, the original coding is applied.

Suppl. Figure 1c. SIPI interaction models: additive-additive (AA) mode<sup>1</sup>

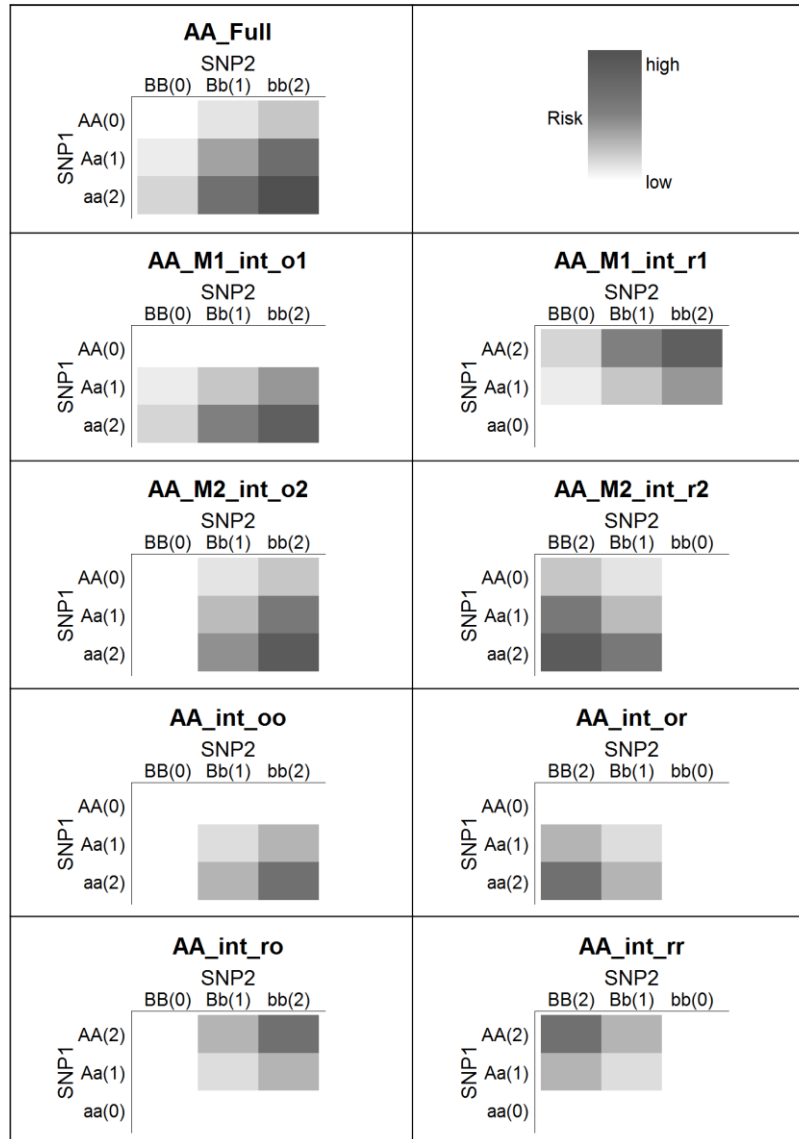

<sup>1</sup> **Model label:** 'A' (additive); 'Full' (full interaction), 'M1\_int' (SNP1 main effect plus interaction); coding direction: 'o1' (original for SNP1), 'o2' (original for SNP2), 'r1' (reverse for SNP1), 'r2' (reverse for SNP2), 'oo' (original-original for SNP1-SNP2), 'or' (reverse-original), 'ro' (reverse-original), and 'rr' (reverse-reverse). The labels of two axes are '**genotype (coding)**'. A lowercase and capital letter denotes the minor and major allele, respectively. Color levels represent present outcome proportions. The darker the color, the higher the outcome proportion. For the 'Full' model, the figure is an example pattern based on both minor alleles as risk alleles. These plots are the SIPI pattern examples based on positive model coefficients in SIPI models. If coding direction ('o'/'r') is not specified, the original coding is applied.

Suppl. Figure 2. Comparison of Type I errors of AA9int, Five-Full and SIPI

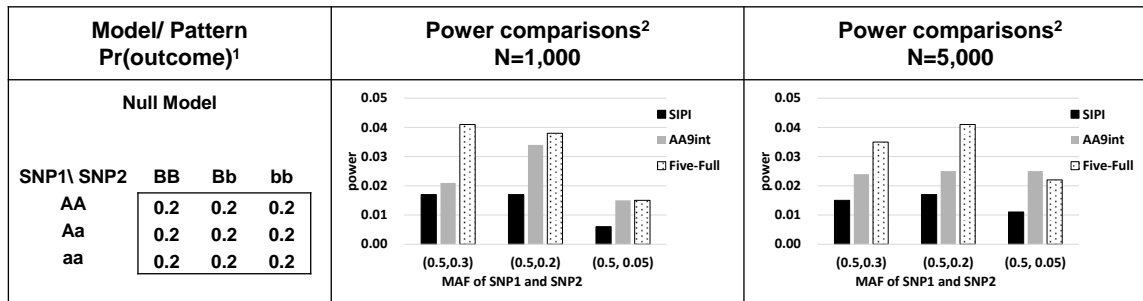

<sup>1</sup>Values in the 3x3 table are present outcome proportions. A lowercase and capital letter denotes the minor and major allele, respectively. <sup>2</sup> SIPI (SNP Interaction Pattern Identifier), AA9int (Additive-additive 9 interaction-model approach), and Five-Full (Five full interaction-model approach). MAF: minor allele frequency
